# Supplementary material for: MART-10 represses cholangiocarcinoma cell growth and high vitamin D receptor expression indicates better prognosis for cholangiocarcinoma
Source: PubMed Central journal article supplement (PMC5335655; doi:10.1038/srep43773), 2017-03-03
Supplement: srep43773-s1.pdf [file srep43773-s1.pdf]

**MART-10 represses cholangiocarcinoma cell growth and high vitamin D receptor expression indicates better prognosis for cholangiocarcinoma**

Kun-Chun Chiang<sup>1,2\*</sup>, Ta-Sen Yeh<sup>3\*</sup>, Cheng-Cheng Huang<sup>4</sup>, Yu-Chan Chang<sup>5</sup>, Horng-Heng Juang<sup>#6</sup>, Chi-Tung Cheng<sup>3</sup>, Jong-Hwei S. Pang<sup>7</sup>, Jun-Te Hsu<sup>3</sup>, Masashi Takano<sup>8</sup>, Tai C Chen<sup>9</sup>, Atsushi Kittaka<sup>8</sup>, Michael Hsiao<sup>5#</sup> and Chun-Nan Yeh<sup>3#</sup>

<sup>1</sup>General Surgery Department, Chang Gung Memorial Hospital, Keelung, Taiwan, R.O.C, Chang Gung University

<sup>2</sup>Director of Zebrafish center of Keelung Chang Gung Memorial Hospital, Taiwan, R.O.C

<sup>3</sup>General Surgery Department and Liver research center, Chang Gung Memorial Hospital, Kwei-Shan, Taoyuan, Taiwan, R.O.C, Chang Gung University

<sup>4</sup>Department of Pathology, Chang Gung Memorial Hospital, 222, Mai-Chin Road, Keelung, Taiwan, R.O.C

<sup>5</sup> Genomics Research Center, Academia Sinica, Taipei, Taiwan, R.O.C

<sup>6</sup>Department of Anatomy, College of Medicine, Chang Gung University, Kwei-Shan Taoyuan, Taiwan, 333, R.O.C.

<sup>7</sup>Graduate Institute of Clinical Medical Sciences, College of Medicine, Chang Gung University, Kwei-Shan, Taoyuan, Taiwan, R.O.C.

<sup>8</sup> Faculty of Pharmaceutical Sciences, Teikyo University, Sagamihara, Kanagawa, 252-5195, Japan

<sup>9</sup>Boston University School of Medicine, M-1022, 715 Albany Street, Boston, MA 02118, USA

\* co-first authors

# co-corresponding authors

Correspondence to: Horng-Heng Juang, Department of Anatomy, Chang Gung University, 259

Wen-Hua 1st Road, Kwei-Shan, Taoyuan 333, Taiwan, R.O.C. TEL: +886-3-2118800; FAX:

+886-3-2118112; [hhj143@mail.cgu.edu.tw](mailto:hhj143@mail.cgu.edu.tw), or Michael Hsiao, [mhsiao@gate.sinica.edu.tw](mailto:mhsiao@gate.sinica.edu.tw) or

Chun-Nan Yeh, General Surgery Department, Chang Gung Memorial Hospital, 5, Fu-Hsing Street,

Kwei-Shan, Taoyuan, Taiwan 333, R.O.C. Tel: 03-3281200-3219; Fax: 03-328581;

[yehchunnnan@gmail.com](mailto:yehchunnnan@gmail.com)

**Running title:** MART-10 represses CCA growth in vitro and in vivo

**Keywords:** CCA; MART-10; vitamin D; cholangiocarcinoma;  $1\alpha,25(\text{OH})_2\text{D}_3$ ; NGAL; VDR

**Table 1 Clinicopathological features between VDR high expression and low expression of cholangiocarcinoma patients**

|                           | VDR<br>low expression | VDR<br>high expression | <i>p</i>      |
|---------------------------|-----------------------|------------------------|---------------|
| Age (years)               | 60.64±9.39            | 58.92±13.67            | 0.526         |
| Gender                    |                       |                        | 0.977         |
| Male                      | 15(42.9%)             | 19(43.2%)              |               |
| Female                    | 20(57.1%)             | 25(56.8%)              |               |
| Symptom                   |                       |                        | <b>0.006*</b> |
| Positive                  | 1(2.9%)               | 11(25.0%)              |               |
| Negative                  | 34(97.1%)             | 33(75.0%)              |               |
| AST (IU/l)                |                       |                        | 0.648         |
| ≤ 34                      | 16(47.1%)             | 23(52.3%)              |               |
| >34                       | 18(52.9%)             | 21(47.7%)              |               |
| ALT (U/L)                 |                       |                        | 0.070         |
| ≤ 36                      | 21(67.7%)             | 19(46.3%)              |               |
| >36                       | 10(32.3%)             | 22(53.7%)              |               |
| ALP (U/L)                 |                       |                        | 0.099         |
| ≤ 94                      | 7(20.6%)              | 16(38.1%)              |               |
| >94                       | 27(79.4%)             | 26(61.9%)              |               |
| Bilirubin (total) (mg/dl) |                       |                        | 0.904         |
| ≤ 1.3                     | 29(82.9%)             | 36(81.8%)              |               |
| >1.3                      | 6(17.1%)              | 8(18.2%)               |               |
| Albumin (g/dl)            |                       |                        | 0.459         |
| ≤ 3.5                     | 12(36.4%)             | 11(28.2%)              |               |
| >3.5                      | 21(63.6%)             | 28(71.8%)              |               |
| Serum CEA (ng/ml)         |                       |                        | 0.931         |
| ≤ 5                       | 11(44.0%)             | 14(45.2%)              |               |
| >5                        | 14(56.0%)             | 17(54.8%)              |               |
| Size (cm)                 |                       |                        | 0.175         |
| ≤ 5                       | 11(33.3%)             | 21(48.8%)              |               |
| >5                        | 22(66.7%)             | 22(51.2%)              |               |
| Lymph node                |                       |                        | <b>0.015*</b> |
| Negative                  | 17(48.6%)             | 33(75.0%)              |               |
| Positive                  | 18(51.4%)             | 11(25.0%)              |               |
| Differentiated            |                       |                        | 0.910         |
| Well                      | 1(2.9%)               | 1(2.3%)                |               |
| Moderate                  | 17(48.6%)             | 24(54.5%)              |               |
| Poorly                    | 16(45.7%)             | 17(38.6%)              |               |
| other                     | 1(2.9%)               | 2(4.5%)                |               |
| Margin                    |                       |                        | <b>0.008*</b> |
| Negative                  | 19(54.3%)             | 36(81.8%)              |               |
| positive                  | 16(45.7%)             | 8(18.2%)               |               |
| Post Chemotherapy         |                       |                        | 0.526         |
| Without                   | 16(45.7%)             | 17(38.6%)              |               |
| With                      | 19(54.3%)             | 27(61.4%)              |               |
| Post Radiotherapy         |                       |                        | 1.000         |
| Without                   | 31(88.6%)             | 38(86.4%)              |               |
| With                      | 4(11.4%)              | 6(13.6%)               |               |

**Table 2 Univariate Analysis of Factors Influencing the Overall Survival of the 79 CCA Patients**

| Factors             | Survival Time (months) |                  |            |            | <i>p</i>         |
|---------------------|------------------------|------------------|------------|------------|------------------|
|                     | Median                 | 95% CI of Median | 3-year (%) | 5-year (%) |                  |
| Gender              |                        |                  |            |            | 0.756            |
| Male (n=34)         | 14.53                  | 6.64-22.42       | 20.6       | 17.6       |                  |
| Female (n=45)       | 10.82                  | 5.85-15.79       | 24.4       | 15.0       |                  |
| Age                 |                        |                  |            |            | 0.547            |
| ≤ 60 (n=39)         | 12.89                  | 6.05-19.73       | 25.6       | 20.5       |                  |
| >60 (n=40)          | 12.99                  | 7.23-18.74       | 20.0       | 12.0       |                  |
| Symptoms            |                        |                  |            |            | <b>0.006</b>     |
| Negative (n=12)     | 37.71                  | 4.78-70.63       | 58.3       | 41.7       |                  |
| Positive (n=67)     | 10.71                  | 5.83-15.61       | 16.4       | 11.8       |                  |
| AST (IU/l)          |                        |                  |            |            | 0.181            |
| ≤ 34 (n=39)         | 13.32                  | 9.53-17.10       | 30.8       | 22.8       |                  |
| >34 (n=39)          | 10.72                  | 3.88-17.56       | 15.4       | 10.3       |                  |
| ALT (IU/l)          |                        |                  |            |            | 0.587            |
| ≤ 36 (n=40)         | 12.99                  | 6.41-19.56       | 25.0       | 19.7       |                  |
| >36 (n=32)          | 13.84                  | 5.82-21.86       | 18.8       | 9.4        |                  |
| ALP (IU/L)          |                        |                  |            |            | <b>0.008</b>     |
| ≤ 94 (n=23)         | 23.90                  | 11.65-36.15      | 39.1       | 29.8       |                  |
| >94 (n=53)          | 10.29                  | 6.67-13.91       | 15.1       | 9.4        |                  |
| Bil (total) (mg/dl) |                        |                  |            |            | 0.600            |
| ≤ 1.3 (n=65)        | 12.99                  | 7.24-18.74       | 24.6       | 16.7       |                  |
| >1.3 (n=14)         | 10.72                  | 0.00-22.23       | 14.3       | 14.3       |                  |
| Albumin (g/dl)      |                        |                  |            |            | 0.054            |
| ≤ 3.5 (n=23)        | 5.75                   | 3.95-7.55        | 17.4       | 13.0       |                  |
| >3.5 (n=49)         | 19.04                  | 13.31-24.76      | 24.5       | 15.9       |                  |
| Serum CEA (ng/dl)   |                        |                  |            |            | <b>0.043</b>     |
| ≤ 5 (n=25)          | 18.51                  | 2.09-34.93       | 40.0       | 27.0       |                  |
| >5 (n=31)           | 10.29                  | 4.05-16.53       | 6.5        | 6.5        |                  |
| Margin              |                        |                  |            |            | <b>&lt;0.001</b> |
| Negative (n=55)     | 19.43                  | 14.17-24.69      | 32.7       | 23.4       |                  |
| Positive (n=24)     | 4.41                   | 2.43-6.38        | 0.0        | 0.0        |                  |
| Size                |                        |                  |            |            | <b>0.005</b>     |
| ≤ 5cm (n=32)        | 19.99                  | 13.75-26.23      | 37.5       | 30.7       |                  |
| >5cm (n=44)         | 9.11                   | 3.09-15.13       | 13.6       | 6.8        |                  |
| Lymph node          |                        |                  |            |            | 0.099            |
| Negative (n=50)     | 19.04                  | 8.44-29.63       | 28.0       | 17.6       |                  |
| Positive (n=29)     | 10.45                  | 0.00-22.71       | 13.8       | 13.8       |                  |

|                        |       |             |      |      |                  |
|------------------------|-------|-------------|------|------|------------------|
| Histology              |       |             |      |      | 0.177            |
| Well (n=2)             | 2.73  | NA          | 0.0  | 0.0  |                  |
| Moderate (n=41)        | 13.84 | 7.45-20.23  | 22.0 | 17.1 |                  |
| Poor (n=33)            | 12.99 | 5.25-20.72  | 27.3 | 17.3 |                  |
| Others(n=3)            | 10.72 | 0.56-20.87  | 0.0  | 0.0  |                  |
| VDR                    |       |             |      |      | <b>&lt;0.001</b> |
| Low expression (n=35)  | 5.66  | 2.84-8.48   | 0    | 0    |                  |
| High expression (n=44) | 26.14 | 14.99-37.29 | 40.9 | 29.2 |                  |
| Post-op Chemotherapy   |       |             |      |      | 0.962            |
| Without (n=33)         | 5.65  | 2.47-8.84   | 30.3 | 23.9 |                  |
| With (n=46)            | 14.53 | 9.80-19.27  | 17.4 | 10.9 |                  |
| Post-op Radiotherapy   |       |             |      |      | 0.074            |
| Without (n=69)         | 13.32 | 8.80-17.83  | 26.1 | 18.6 |                  |
| With (n=10)            | 6.97  | 5.29-8.65   | 0.0  | 0.0  |                  |

---

AST: aspartate aminotransferase; ALT: alanine amionotransferase; ALP: alkaline phosphatase; CEA: carcinoembryonal antigen; CA 19-9: carbohydrate antigen; IU: international unit; op: operation

---

**Table3 Cox's Proportional Hazards Analysis**

| <b>Factors</b>               | <b>Relative Risk<br/>(95% confidence interval)</b> | <b><i>p</i></b> |
|------------------------------|----------------------------------------------------|-----------------|
| Symptoms (positive/negative) | 2.46(0.55-10.99)                                   | 0.238           |
| ALP(>94 g/dl / ≤94g/dl)      | 1.39(0.60-3.26)                                    | 0.444           |
| Serum CEA (>5ng/ml/ ≤5ng/ml) | 1.24(0.59-2.58)                                    | 0.568           |
| Tumor size (>5 cm/ ≤5 cm)    | 1.38(0.66-2.89)                                    | 0.397           |
| Margin(positive /negative)   | 1.54(0.73-3.24)                                    | 0.259           |
| VDR expression(high/low)     | 0.25(0.11-0.53)                                    | <0.001          |
